# Supplementary figures and images for: Polyamine stimulation perturbs intracellular Ca2+ homeostasis and decreases viability of breast cancer BT474 cells
Source: publisher site journal article supplement (doi:10.1515/znc-2019-0119), 2020-02-24

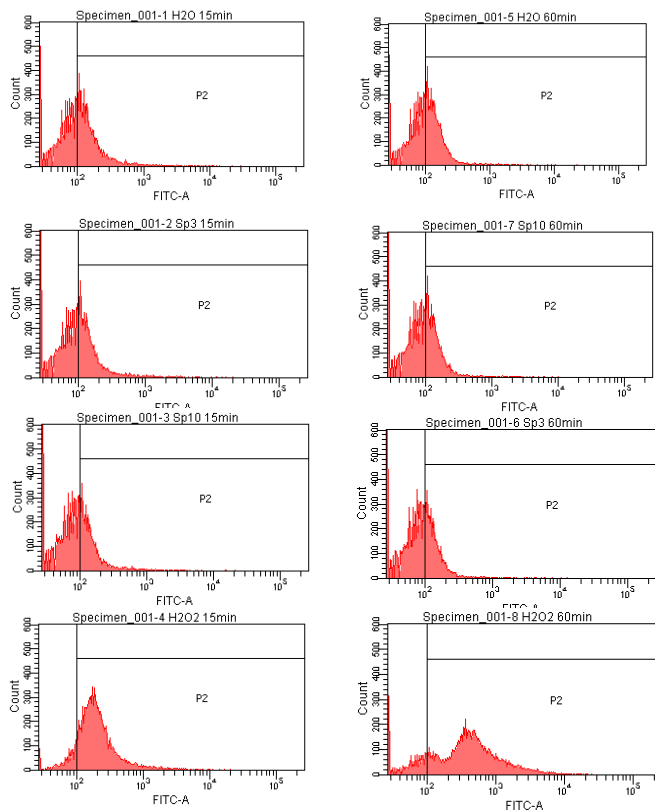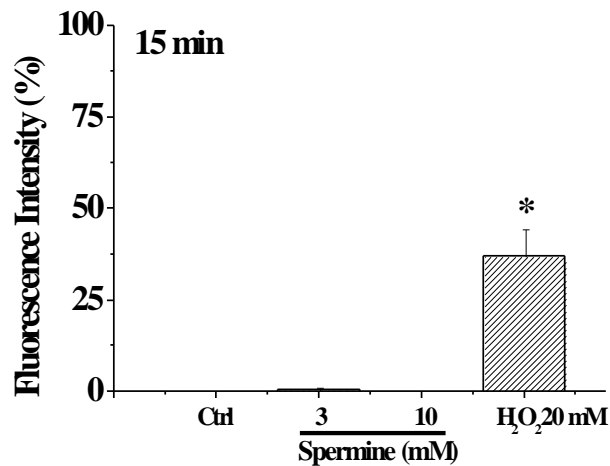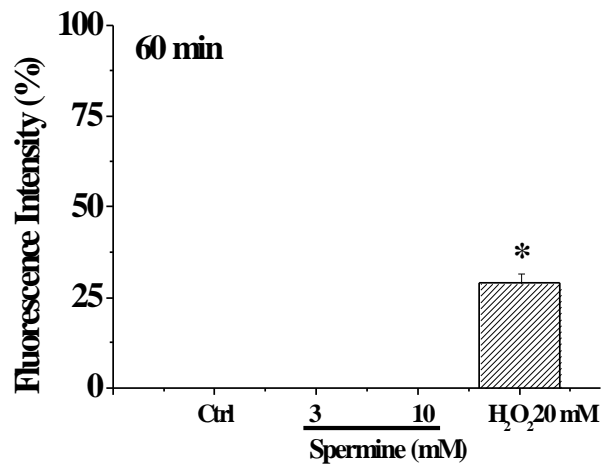

Supplement: Supplementary file 1 [file znc-2019-0119_suppl.zip]
